# Supplementary material for: Neratinib overcomes trastuzumab resistance in HER2 amplified breast cancer
Source: PubMed Central journal article supplement (PMC3858548; doi:10.18632/oncotarget.1148), 2013-07-25
Supplement: oncotarget-04-1592-s002.pdf [file oncotarget-04-1592-s002.pdf]

**Supplementary Table 1. Classification of breast cancer cell line subtypes and response to neratinib (IC<sub>50</sub>).**

| <b>Cell Line</b>  | <b>IC<sub>50</sub> value (μM)</b> | <b>IC<sub>50</sub> SE</b> | <b>Breast Cancer Subtype</b> | <b>ER Status</b> |
|-------------------|-----------------------------------|---------------------------|------------------------------|------------------|
| <b>BT-474</b>     | <0.005                            | n/a                       | HER2+                        | Positive         |
| <b>EFM-192A</b>   | <0.005                            | n/a                       | HER2+                        | Positive         |
| <b>HCC1569</b>    | <0.005                            | n/a                       | HER2+                        | Negative         |
| <b>HCC1954</b>    | <0.005                            | n/a                       | HER2+                        | Negative         |
| <b>MDA-MB-175</b> | <0.005                            | n/a                       | Luminal                      | Positive         |
| <b>MDA-MB-361</b> | <0.005                            | n/a                       | HER2+                        | Positive         |
| <b>SK-BR-3</b>    | <0.005                            | n/a                       | HER2+                        | Negative         |
| <b>UACC-812</b>   | <0.005                            | n/a                       | HER2+                        | Positive         |
| <b>UACC-893</b>   | <0.005                            | n/a                       | HER2+                        | Positive         |
| <b>SUM-225</b>    | 0.01                              | 0.00                      | HER2+                        | Negative         |
| <b>SUM-190</b>    | 0.01                              | 0.00                      | HER2+                        | Positive         |
| <b>ZR-75-1</b>    | 0.03                              | 0.02                      | Luminal                      | Positive         |
| <b>HCC70</b>      | 0.03                              | 0.20                      | Triple Negative              | Negative         |
| <b>BT-20</b>      | 0.07                              | 0.04                      | Triple Negative              | Negative         |
| <b>MDA-MB-453</b> | 0.09                              | 0.00                      | HER2+                        | Negative         |
| <b>HCC1187</b>    | 0.10                              | 0.07                      | Triple Negative              | Negative         |
| <b>EFM-19</b>     | 0.11                              | 0.07                      | Luminal                      | Positive         |
| <b>T-47D</b>      | 0.16                              | 0.04                      | Luminal                      | Positive         |
| <b>MDA-MB-134</b> | 0.17                              | 0.00                      | Luminal                      | Positive         |
| <b>HCC38</b>      | 0.25                              | 0.12                      | Triple Negative              | Negative         |
| <b>MDA-MB-435</b> | 0.33                              | 0.06                      | Triple Negative              | Negative         |
| <b>MDA-MB-468</b> | 0.33                              | 0.80                      | Triple Negative              | Negative         |
| <b>CAMA-1</b>     | 0.37                              | 0.52                      | Luminal                      | Positive         |
| <b>MDA-MB-436</b> | 0.41                              | 0.00                      | Triple Negative              | Negative         |
| <b>MCF-7</b>      | 0.41                              | 0.03                      | Luminal                      | Positive         |
| <b>MDA-MB-415</b> | 0.42                              | 0.00                      | Luminal                      | Positive         |
| <b>HCC1806</b>    | 0.44                              | 0.13                      | Triple Negative              | Negative         |
| <b>HCC1395</b>    | 0.49                              | 0.52                      | Triple Negative              | Negative         |
| <b>HCC1937</b>    | 0.50                              | 0.26                      | Triple Negative              | Negative         |
| <b>HCC1143</b>    | 0.54                              | 0.19                      | Triple Negative              | Negative         |
| <b>UACC-732</b>   | 0.65                              | 0.37                      | HER2+                        | Positive         |
| <b>MDA-MB-231</b> | 1.00                              | 0.17                      | Triple Negative              | Negative         |
| <b>MDA-MB-157</b> | 1.12                              | 0.00                      | Triple Negative              | Negative         |
| <b>BT-549</b>     | 1.14                              | 0.53                      | Triple Negative              | Negative         |
| <b>KPL-1</b>      | 1.89                              | 0.16                      | Luminal                      | Positive         |
| <b>CAL-51</b>     | 1.89                              | 2.06                      | Triple Negative              | Negative         |

Abbreviation: n/a – not applicable

**Supplementary Table 2. Relationship between neratinib sensitivity (IC<sub>50</sub> values) and potential biomarkers in a panel of 11 HER2 amplified breast cancer cell lines.** Correlations were performed using the Spearman's Rank or Mann Whitney *U* test.

| <b>Marker</b>                 | <b>p value</b> | <b>r</b> |
|-------------------------------|----------------|----------|
| <b>EGFR</b>                   | 0.720          | 0.115    |
| <b>pEGFR</b>                  | 0.071          | -0.600   |
| <b>HER2</b>                   | 0.038          | -0.665   |
| <b>p-HER2</b>                 | 0.042          | -0.643   |
| <b>p95-HER2</b>               | 0.098          | -0.523   |
| <b>HER3</b>                   | 0.796          | -0.820   |
| <b>pHER3</b>                  | 0.433          | -0.248   |
| <b>IGF-IR</b>                 | 0.239          | 0.373    |
| <b>p-IGF-IR</b>               | 0.478          | -0.236   |
| <b>AKT</b>                    | 0.863          | -0.055   |
| <b>pAKT</b>                   | 0.546          | -0.191   |
| <b>p27</b>                    | 0.966          | 0.014    |
| <b>PI3K status</b>            | 0.340          | NA*      |
| <b>PTEN status (low/high)</b> | 0.200          | NA       |
| <b>ER status</b>              | 0.140          | NA       |

\*NA – not applicable
